# Supplementary material for: Tunable mechanical properties of PDMS–TMPTMA microcapsules for controlled release in coatings
Source: Royal Society of Chemistry journal article supplement (doi:10.1039/d4sm01107d), 2025-01-01
Supplement: d4sm01107d1.pdf [file d4sm01107d1.pdf]

# Supplementary Information for "Tunable Mechanical Properties of PDMS-TMPTMA Microcapsules for Controlled Release in Coatings"

Congwang Ye, Bianka Pajo and Carlos Martinez

December 16, 2024

## Supplementary Figures

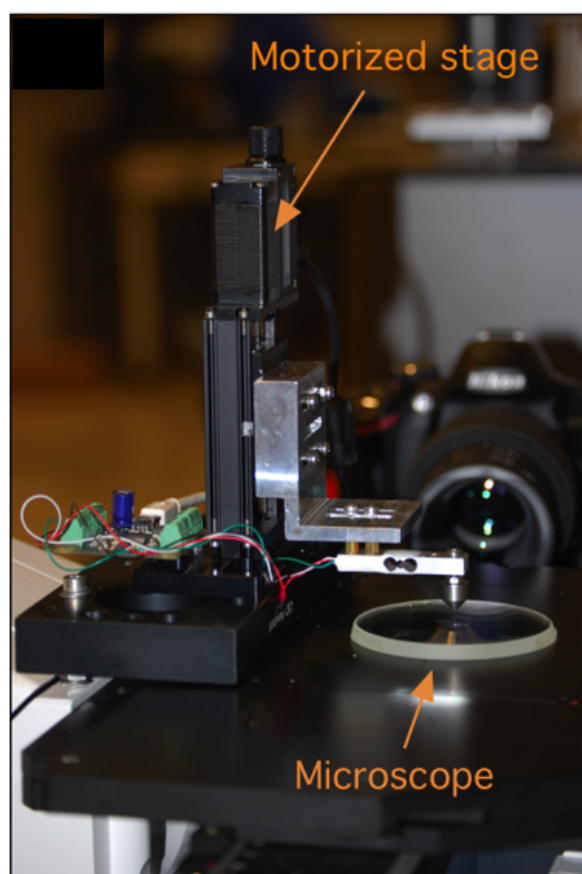

Figure 1: Photograph of compression setup on an inverted microscope used to test measure the load at failure of PDMS:TMPTMA microcapsules.

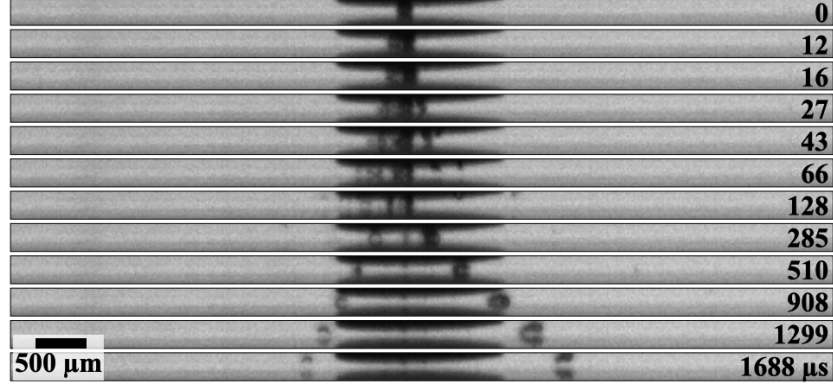

Figure 2: Sequence of images showing the breakup of a 0:100 PDMS:TMPTMA microcapsule with a  $d_{\text{inn}} = 179 \mu\text{m}$  and  $d_{\text{out}} = 222 \mu\text{m}$ , corresponding to a  $t_{\text{shell}}/r_{\text{out}} = 0.096$ . The microcapsule appears as a dark circle between horizontal plates on the top image (time = 0  $\mu\text{s}$ ).

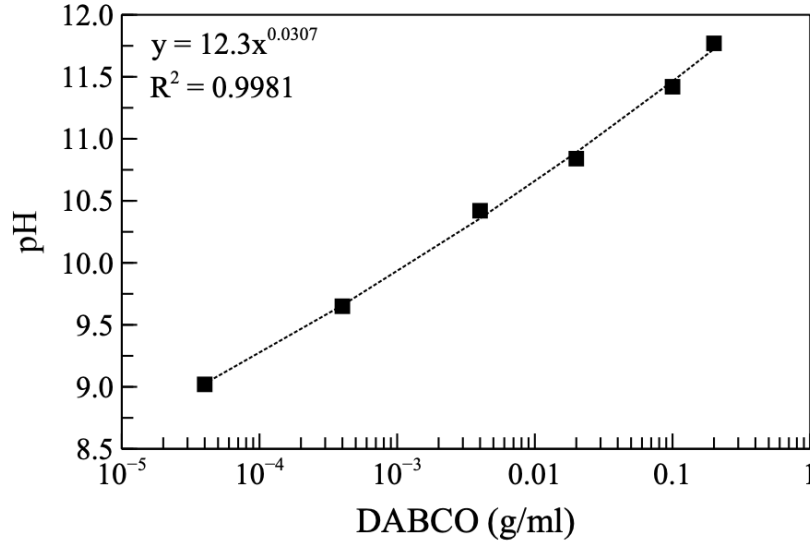

Figure 3: pH as a function of DABCO concentration calibration plot. The dashed line is the power fit.
